# Supplementary material for: Prevalence, Treatment, and Control of Hypercholesterolemia in High Cardiovascular Risk Patients: Evidences from a Systematic Literature Review in Spain
Source: PubMed Central journal article supplement — Adv Ther. 2015 Oct 26;32(10):944–61. doi: 10.1007/s12325-015-0252-y (PMC4635180; doi:10.1007/s12325-015-0252-y), 2015-10-26
Supplement: 12325_2015_252_MOESM1_ESM.pdf [file 12325_2015_252_MOESM1_ESM.pdf]

## *Why carry out this study?*

- According to the World Health Organization (2002), approximately 8% of all deaths, 56% of ischemic heart disease, and 18% of cerebrovascular disease are caused by high levels of cholesterol.
- Hypercholesterolemia and associated vascular diseases have a significant economic and socio-sanitary impact. For instance, 8% of total health spending in Spain (2012) was as a result of cardiovascular diseases.
- This review addresses the prevalence of hypercholesterolemia, the usual clinical management of lipid profile, and the attained control of low-density lipoprotein cholesterol levels in patients with high cardiovascular risk from Spain.

## *What was learned from the study?*

- An elevated prevalence of hypercholesterolemia can be found in patients at high cardiovascular risk.
- Although most patients are receiving pharmacological treatment, rates of lipid control continue to be low, both in primary and secondary prevention.

This summary slide represents the opinions of the authors. Sponsorship for this study was funded by Sanofi Iberia. For a full list of acknowledgments and disclosures for all authors of this article, please see the full text online. © The Author(s) 2015. Creative Commons Attribution Noncommercial License (CC BY-NC).
